# Supplementary material for: Transcriptional control of a collagen deposition and adhesion process that promotes lung adenocarcinoma growth and metastasis
Source: PubMed Central journal article supplement (PMC8765047; doi:10.1172/jci.insight.153948), 2022-01-11
Supplement: jciinsight-7-153948-s150.pdf [file jciinsight-7-153948-s150.pdf]

Table S1. Cell lines used in this study.

| Cell line name                | E/M status | mutations                                         |
|-------------------------------|------------|---------------------------------------------------|
| Murine lung cancer cell lines |            |                                                   |
| 307P                          | E          | Kras <sup>LA1/+</sup> /Trp53 <sup>R172HΔg/+</sup> |
| 393P                          | E          | Kras <sup>LA1/+</sup> /Trp53 <sup>R172HΔg/+</sup> |
| 393LN                         | E          | Kras <sup>LA1/+</sup> /Trp53 <sup>R172HΔg/+</sup> |
| 412P                          | E          | Kras <sup>LA1/+</sup> /Trp53 <sup>R172HΔg/+</sup> |
| 531P1                         | E          | Kras <sup>LA1/+</sup> /Trp53 <sup>R172HΔg/+</sup> |
| 713P                          | E          | Kras <sup>LA1/+</sup> /Trp53 <sup>R172HΔg/+</sup> |
| 344P                          | M          | Kras <sup>LA1/+</sup> /Trp53 <sup>R172HΔg/+</sup> |
| 344SQ                         | M          | Kras <sup>LA1/+</sup> /Trp53 <sup>R172HΔg/+</sup> |
| 344LN                         | M          | Kras <sup>LA1/+</sup> /Trp53 <sup>R172HΔg/+</sup> |
| 531LN1                        | M          | Kras <sup>LA1/+</sup> /Trp53 <sup>R172HΔg/+</sup> |
| 531LN2                        | M          | Kras <sup>LA1/+</sup> /Trp53 <sup>R172HΔg/+</sup> |
| 531P2                         | M          | Kras <sup>LA1/+</sup> /Trp53 <sup>R172HΔg/+</sup> |
| 393P Vec                      | E          | Kras <sup>LA1/+</sup> /Trp53 <sup>R172HΔg/+</sup> |
| 393P ZEB1                     | M          | Kras <sup>LA1/+</sup> /Trp53 <sup>R172HΔg/+</sup> |
| 307P Vec                      | E          | Kras <sup>LA1/+</sup> /Trp53 <sup>R172HΔg/+</sup> |
| 307P ZEB1                     | M          | Kras <sup>LA1/+</sup> /Trp53 <sup>R172HΔg/+</sup> |
| Human lung cancer cell lines  |            |                                                   |
| H1299                         | M          | TP53 <sup>-/-</sup>                               |
| H157                          | M          | KRAS <sup>G12R</sup> /TP53 (E298*)                |
| HCC827                        | E          | EGFR (exon19del E746–A750)                        |
| HCC827_Vec                    | E          | EGFR (exon19del E746–A750)                        |
| HCC827 ZEB1                   | M          | EGFR (exon19del E746–A750)                        |
