# Supplementary material for: Transcriptional control of a collagen deposition and adhesion process that promotes lung adenocarcinoma growth and metastasis
Source: PubMed Central journal article supplement (PMC8765047; doi:10.1172/jci.insight.153948), 2022-01-11
Supplement: jciinsight-7-153948-s151.pdf [file jciinsight-7-153948-s151.pdf]

Table S2: Primers

| <b>qPCR primers</b>                              |                                                       |                                |
|--------------------------------------------------|-------------------------------------------------------|--------------------------------|
| <b>Gene</b>                                      | <b>Forward (5'-3')</b>                                | <b>Reverse (5'-3')</b>         |
| Itga1 (mouse)                                    | TGGCTTCTCACGTTATCCTA                                  | CACACAAGGCATTGATCTCTCT         |
| Itgb1 (mouse)                                    | CTCCAGAAGGTGGCTTTGATGC                                | GTGAAACCCAGCATCCGTGGAA         |
| ITGA1(human)                                     | CCGAAGAGGTACTTGTTCAGC                                 | GGCTCCGTGAATGCCTCCTTT          |
| Rpl32(mouse)                                     | GGAGAAGGTTCAAGGGCCAG                                  | TGCTCCATAACCGATGTTTG           |
| RPL32 (human)                                    | CCTTGTGAAGCCCAAGATCG                                  | TGCCGATGAACTTCTTGGT            |
| Zeb1 (mouse)                                     | GCTCAGCCAGGAACCCGAG                                   | TGGGCACCCTCTGCCACACA           |
| Itgb1 (mouse)                                    | CTACTTCTGCACGATGTGATGAT                               | TTGGCTGGCAACCCTTCTTT           |
| Itga2 (mouse)                                    | TGTCTGGCGTATAATGTTGGC                                 | CTTGTGGGTTTCGTAAGCTGCT         |
| Itga10 (mouse)                                   | CACCAGAGGCCGAATTTGGAT                                 | CCCCAACATGCTGTAAGACAC          |
| Itga11 (mouse)                                   | TGGAGATGTGCGAGACTGGCTT                                | GAGGAATCACCTTGCCAGCACT         |
| Ddr1 (mouse)                                     | TGCTGCTTCTCATCATCGCGCT                                | GGACAGAAAGGTGAACCGTCAG         |
| Ddr2 (mouse)                                     | TCATCCTGTGGAGGCAGTTCTG                                | CTGTTCACTTGGTGTGAGGAGC         |
| Hdac1 (mouse)                                    | TGAAGCCTCACCGAATCCGCAT                                | TGGTCATCTCCTCAGCATTGGC         |
| Hdac2 (mouse)                                    | GTTTTGTCAGCTCTCCACGGGT                                | CTTGGCATGATGTAGTCTCCAG         |
| Hdac3 (mouse)                                    | AACCTCATCGCTGCGATTGAC                                 | GTAGTCCTCAGAATGGAAGCGG         |
| Hdac4 (mouse)                                    | AGCAGGAGCTGCTTTCAGACA                                 | ACAGAGGTCTGTGGCTGCCAAA         |
| Hdac5 (mouse)                                    | ACCAGCAGTTCCTGGAGAAGCA                                | TCCGTCAGCTCCTTCTGTCT           |
| Hdac6 (mouse)                                    | TCGCTGTCTCATCCTACCTGCT                                | GTCAAAGTTGGCACCTTCACGG         |
| Hdac7 (mouse)                                    | CGCCTCAAAGTGGATAACGGGA                                | GCATTGGAGGAATGCAGCTCGT         |
| Hdac8 (mouse)                                    | GTCAGCCAAGAAGGTGATGAGG                                | ACACTTCCCGTCAATCAGGCAC         |
| Hdac9 (mouse)                                    | CTTGAAGGTGCGGTCCAGGTTA                                | GCTGCTACTGACCGAGGATTCT         |
| Hdac10 (mouse)                                   | GGTGGATTGACTCTGTATCG                                  | CCTCCAACACAGCACAAATCCG         |
| Hdac11 (mouse)                                   | AAGGCATCTCCAGAGCCACCAT                                | CAGGGTAGATGTGGCGTTGTA          |
| Kif5a (mouse)                                    | AGCAGATGCTGGACCAGGAAGA                                | TTCACCTCGTCTTCGAGCAT           |
| <b>miRNA qPCR RT primers</b>                     |                                                       |                                |
| U6-RT                                            | GTCGTATCCAGTGCAGGGTCCGAGGTATTTCGCACTGGATACGACAAAATATG |                                |
| miR-148a-RT                                      | GTCGTATCCAGTGCAGGGTCCGAGGTATTTCGCACTGGATACGACAAAAG    |                                |
| miR-103a-RT                                      | GTCGTATCCAGTGCAGGGTCCGAGGTATTTCGCACTGGATACGACTCATAG   |                                |
| <b>miRNA qPCR primers</b>                        | <b>Forward (5'-3')</b>                                | <b>Reverse (5'-3')</b>         |
| U6                                               | GCGCGTCGTGAAGCGTTC                                    | GTGCAGGGTCCGAGGT               |
| miR-148a                                         | GCGCTCAGTGCCTACAGAAC                                  | GTGCAGGGTCCGAGGT               |
| miR-103a                                         | GCAGCATTGTACAGGGCTATG                                 | GTGCAGGGTCCGAGGT               |
| <b>Clone primers</b>                             |                                                       |                                |
| <b>Primers for promoter cloning (PGL3-Basic)</b> |                                                       |                                |
| Pltga1-2k                                        | CGACGCGTTGATGTTGGAGCAGTAGCTGAG                        | CCGCTCGAGGACGCCTGGGGACCATTG    |
| <b>Primers for gene expression (pLVX-puro)</b>   |                                                       |                                |
| Itga1 (mouse)                                    | CCGCTCGAGATGGTCCCCAGGCGTC                             | GCTCTAGATCATTCTCCATTTTCTTTAGTG |
